# Supplementary material for: Enhancing Long-Term Trend Simulation of Global Tropospheric OH and Its Drivers from 2005–2019: A Synergistic Integration of Model Simulations and Satellite Observations
Source: Copernicus journal article supplement (doi:10.5194/egusphere-2024-410), 2024-02-29
Supplement: Supplementary file [file egusphere-2024-410-AC2-supplement.pdf]

Hydroxyl radical (OH) is the most important oxidant in the troposphere that governs the oxidation power, while its spatial-temporal patterns are yet to be clear at present. The authors of this study developed an integrated data- and model-driven approach to predict the convoluted response of TOH to its five proxies, which include NO<sub>2</sub>, HCHO, H<sub>2</sub>O, Trop O<sub>3</sub>, and Strat O<sub>3</sub>. They investigated the trends and drivers of global, hemispheric, and regional OH from 2005 to 2019. Overall, this study has provided interesting results, which will help deepen our understanding of the changes in global tropospheric OH over the past decades. I have several concerns about the method that could impact the robustness of the results.

1) Is there any method to evaluate the response of OH to different input parametrizations that were calculated by Eq. (5)? These semi-normalized sensitivities laid the foundation for understanding the impacts from different proxies/drivers on tropospheric OH. I would like to see some aspects of “evaluation” or at least a comparison with previous other studies.

#### Response

**We thank the reviewer for their constructive comments and the major point they raised about the evaluation of the response of OH to several parameters. We would like to address this comment in three ways: *the nature of this statistical approach vs. an explicit full chemistry model, qualitative agreement of the tendency of the sensitivity with theoretical expectations, and providing evidence of the capability of the framework at picking up non-linearities.***

#### **The nature of this statistical approach vs. an explicit full chemistry model:**

**The limitation of statistical approaches in fully resolving “cause and effect” has been widely recognized in literature. Similarly, in the case of the ECCOH, we cannot entirely disentangle causation from correlation based solely on establishing a relationship between the distribution of OH and its influencers. As discussed in the paper and related references, the aim of the ECCOH framework is not to replicate all physical capabilities of a physics-based model, but rather to provide a first-order sensitivity experiment capable of qualitatively studying the effect of the biases in the input data on OH. This allows for more systematic strategies for full chemistry runs.**

**Robust evaluation of the sensitivities are mainly limited by the implicit nature of statistical methods. The implicit nature of statistical methods makes it difficult to identify a specific physiochemical process in a full chemistry model that is representative of the perturbation made to the OH parameterization. For example, perturbation of NO<sub>2</sub> in ECCOH represents the empirical relationship between OH and NO, which involves multiple processes, including NO+HO<sub>2</sub> (RO<sub>2</sub>), NO<sub>2</sub>+OH, the formation of ozone, aerosol HO<sub>x</sub> update, and radiation; thus, it is not restricted to specific chemical reaction. However, we do not know to what extent these processes are implicitly included in the perturbations. Similarly, the perturbation of HCHO does not necessarily represent the HCHO+OH reaction but rather where this compound can be used as a proxy for OH (discussed later).**

**Despite these challenges, it is important to recognize that the aim of ECCOH was not uniquely to improve the estimation of OH. Instead, the parameterization includes various input parameters (~ 27 inputs) so that the machine-learning algorithm could better understand the relationship between OH and its drivers for a wide range of atmospheric conditions. Because of this reason ECCOH has been able to represent OH distributions for extreme events (such as El Nino) that were not used during the training (Anderson et al., 2022, 2023, 2024). Without a proper**

establishment of the sensitivities (i.e., right OH prediction for a wrong reason), we would not have been able to reproduce OH distributions for such events.

ECCOH exhibits greater flexibility than some statistical approaches that use simpler assumptions (Valin et al., 2016; Murray et al., 2021; Wolfe et al., 2019; Pimlot et al., 2022), which may not fully capture complexities associated with the real atmosphere such as the effect of clouds and surface albedo or be applicable over high HO<sub>x</sub> conditions. For example, the global approximation of OH as function of reactive nitrogen formulated in Murray et al. (2021) may not be applicable for a wide range of atmospheric conditions. Anderson et al. (2022) carefully selected a vast number of OH-related parameters allowing us to better represent the response of OH to its drivers over both land and ocean and should be considered an improvement towards enhancing statistical-based OH studies.

**The sensitivities qualitatively agree with our theoretical expectations:**

**NO<sub>2</sub>** – It is believed to have positive feedback of reactive nitrogen on tropospheric OH based on both physics-based and statistical studies (Zhao et al., 2019, 2020, He et al. 2021, Chau et al., 2023; Naik et al., 2013; Murray et al., 2013; Strode et al., 2015; Nicely et al., 2018). Likewise, our perturbations in NO<sub>2</sub>, as a surrogate for reactive nitrogen, causes TOH to increase. This increase happens in the tropospheric region. We will show in this response letter that non-linearities occur when we do the perturbations only at the surface layer where NO<sub>x</sub> is elevated because of different reactions such as ozone titration and NO<sub>2</sub>+OH which can reduce OH.

**HCHO** –We used this compound as a proxy (and not a driver) of OH following the studies of Valin et al. (2016) and Wolfe et al. (2019). The equation provided by Wolfe et al. (2019) follows:

$$[HCHO] = \frac{\alpha k'_{OH}[OH] + P_0}{j_{HCHO} + k_{HCHO+OH}[OH]}$$

where the numerator is the production of HCHO from the oxidation of background VOCs, and the denominator is the sink of HCHO through both photolysis and the reaction with OH. In remote regions where  $j_{HCHO} \gg k_{HCHO+OH}[OH]$ , we can safely ignore the reaction of HCHO+OH, and assuming the minor source ( $P_0$ ) to be zero, [HCHO] and [OH] become linearly correlated suggesting that if we see a higher amount of HCHO, there has been more OH to oxidize background VOCs, assuming the slope stays constant (varies only by 5% based on Wolfe et al. (2016)). In high HO<sub>x</sub> regions, [HCHO] and [OH] becomes decoupled. This is what we essentially see from the perturbations in HCHO meaning the ECCOH response coincides with the theoretical expectation.

**Stratospheric ozone** – More stratospheric ozone hampers actinic flux leading to less production of jO<sup>1</sup>D resulting in a negative relationship between this quantity and OH.

**Tropospheric ozone and water vapor** – Both are primary source of OH and show positive feedback on OH. The magnitude of the positive sign can be influenced by the underlying surface albedo, clouds, or other implicit processes.

Now, the pivotal question is can we quantitatively assess these numbers? Since the perturbation of OH drivers in ECCOH are a snapshot of perturbing one variable without considering the response of unperturbed ones, we think it is challenging to replicate the identical experiments in a full chemistry model. Besides, the implicit nature of ECCOH makes it difficult to know exactly

which physiochemical processes we should collectively pick from a full chemistry model to compare with. Therefore, our confidence in perturbation has been mostly achieved through the “weight of evidence”. As a result, all experiments done in our draft should be seen from a statistical and somewhat qualitative perspective.

***Providing evidence of the capability of the framework at picking up non-linearities***

This first reviewer raised a valid concern about the perturbation of NO<sub>2</sub>. They pointed out that we did not have any negative values, but it is expected to see negative tendencies over extremely polluted regions where NO<sub>x</sub> can hamper OH levels. There are two reasons behind this. First, we focused on the tropospheric region where the majority of vertical grid boxes do not experience elevated NO<sub>x</sub> levels. Second, the M2GMI grid resolution is not spatially fine enough to fully resolve non-linear chemistry. However, this is not a major concern for the methane-CO-OH studies, as we intend to use ECCOH for climate studies at coarse resolution and not urban air quality applications. To demonstrate the capability of ECCOH at capturing negative sensitivities for more polluted regions, we applied the perturbation at the surface and calculated the changes in the surface OH mixing ratio. We indeed saw large negative values over polluted regions (shown later), which would be expected from a combined effect of ozone titration and NO<sub>2</sub>+OH in a full chemistry model.

The capability of XGBoost at solving non-linear tendencies has been proven extensively (e.g., Johnson and Zhang, 2014: <https://arxiv.org/pdf/1109.0887>).

**Modifications**

To account for the reviewer’s comment, we added more caveats throughout the paper and also included the perturbation experiments related to surface NO<sub>2</sub>.

In the abstract, the description of the results is already qualitative. But to clarify, we added: “This innovative module helps efficiently predict the convoluted response of TOH to its drivers/proxies in a statistical way.”

In section 2.2.3, right after introducing the method to get the perturbations:

“It is crucial to acknowledge that ECCOH has established an implicit relationship between OH and various input parameters statistically. These perturbations could involve a range of physiochemical processes that are challenging to fully decipher. For example, the perturbation of NO<sub>2</sub>, acting as a surrogate of reactive nitrogen, involves chemical reactions that include reactive nitrogen like NO+HO<sub>2</sub> and NO<sub>2</sub>+OH, ozone formation, aerosol HO<sub>x</sub> uptake, and radiation. Nonetheless, it may not be feasible to understand to what extent these processes have been represented by ECCOH. Therefore, the presented perturbations in this work should be viewed qualitatively.”

In the results and discussion:

“Deciphering the precise chemical processes influencing the response of OH to NO<sub>2</sub> using a machine-learning approach is challenging. However, it is widely recognized that reactive nitrogen has positive feedback on tropospheric OH through increased NO+HO<sub>2</sub> and ozone (Murray et al., 2021; Zhao et al., 2020; He et al., 2021). Considering NO<sub>2</sub> as a surrogate for reactive nitrogen, similar tendencies are expected, as evident from the positive numbers from the sensitivity results obtained from offline calculations. The response of TOH to NO<sub>2</sub> displays a pronounced seasonal cycle stemming mainly from

photochemistry. It is believed to have some negative values for the sensitivity of OH to NO<sub>2</sub> for extremely polluted regions due to radical termination through NO<sub>2</sub>+OH or ozone titration (Nicely et al., 2018). While we have not identified any negative values in the tropospheric domain, we have observed significant negative values of OH when perturbing NO<sub>2</sub> at the model surface layer (Figure S\*). This tendency highlights the ECCOH's ability to account for non-linearities.”

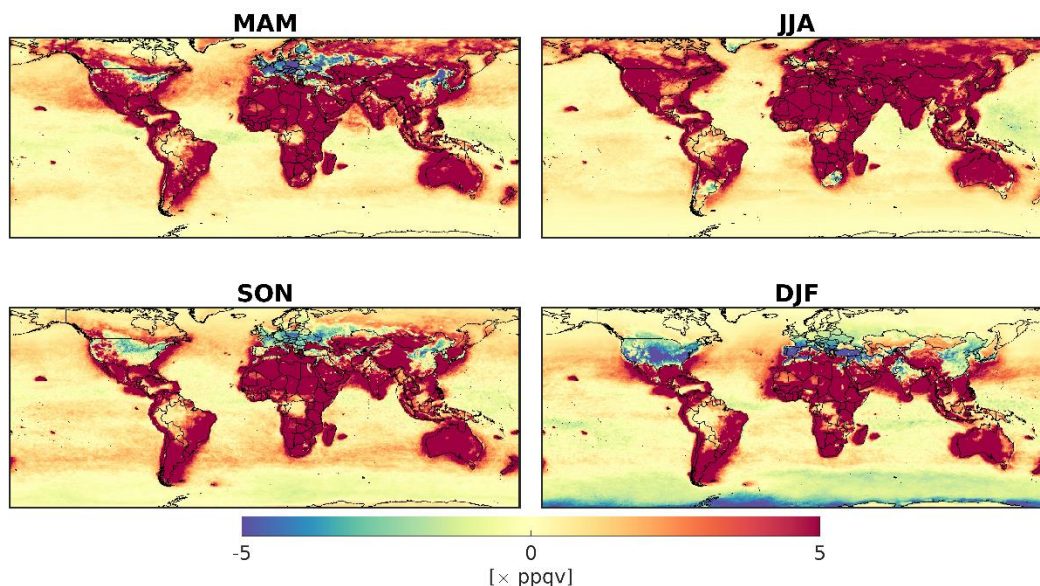

**Figure S\*.** The sensitivity of surface OH to NO<sub>2</sub> perturbations in offline ECCOH in four different seasons.

**To emphasize the relationship between HCHO and OH, we copy our discussion regarding HCHO response map here:** “The interplay between HCHO and OH is contingent on the intricate dynamics governing HCHO production from the oxidation of VOCs and methane and HCHO loss from various chemical pathways (Valin et al., 2016; Wolfe et al., 2019). In remote areas where HO<sub>x</sub> is low, the prevailing sink of HCHO is through photolysis. Conversely, in more polluted areas, the reaction of HCHO+OH emerges as a competing loss pathway. Assuming a steady-state approximation, which is a reasonable assumption for pristine areas, the photolysis loss of HCHO dominates over the reaction with OH, resulting in a linear relationship between HCHO and OH. In other words, high (low) HCHO concentrations are indicative of high (low) TOH. It is because of this that we use HCHO as a proxy of TOH in remote oceanic regions. In regions characterized by heightened HO<sub>x</sub> levels, OH and HCHO become decoupled. Encouragingly, our implicit parametrization of OH has considerable skill at elucidating these intricate chemical tendencies; specifically, it reveals muted responses in regions with relatively tangible pollution levels, whereas positive responses are evident in oceanic regions. Like results obtained for NO<sub>2</sub>, the response map has a seasonal cycle due to photochemistry.” **The qualitative description of the response map for other factors had been provided in section 3.3.2.**

**In the conclusion section:**

“The development of an effective parameterization of OH, that is capable of integrating advanced satellite-based gas retrievals and improved weather forecast models enabled us to unravel the convoluted response of TOH to various parameters. Nonetheless, it is important to recognize some of the limitations associated with our work: **first**, the offline nature of the Bayesian data fusion algorithm makes the entire experiment blind to the interconnected responses of various compounds, such as ozone or aerosols, to adjustments to NO<sub>2</sub> and HCHO. Despite this limitation, our work has provided valuable

insights into the first-order effects of adjustments on TOH key inputs. This can help quickly identify areas where our prior knowledge is least reliable to simulate TOH. **Second, the machine learning algorithm employed for parameterizing OH is implicit and its response to drivers/proxies is complex, making it difficult to quantitatively verify against full chemistry models. However, by including a vast number of parameters in the parameterization, Anderson et al. (2022) boosted its ability to understand the convoluted chemistry of OH. This has allowed for reproducing OH for events not included in the training dataset (Anderson et al., 2022, 2023, 2024).“**

2) The input parameters were perturbed by the scaling factors of 1.1 and 0.9 in the ECCOH offline framework. What about the impacts of these assumed scaling factors? NO<sub>x</sub> and VOCs emissions might change by over 10% between 2005 and 2019, in both developed countries with advanced air pollution control and developing countries with rapid economic growth.

### Response

Thank you for your comment. All the results in the paper are derived from the online ECCOH framework, where various variables are dynamically changing over time (beyond 10%). The purpose of the offline perturbation was to approximate the response of OH to each driver/proxy in order to facilitate the interpretation of our results. The perturbation maps do not drive the results, but they can be used for sanity check. By using the first-order Taylor expansion, one can estimate the change of OH resulting from the changes in driver/proxy.

$$\Delta\text{OH} = S_{\text{driver}} * (\Delta X/X),$$

where  $S_{\text{driver}}$  is the first-order perturbation and X is a driver concentration. This means that we could approximate the third column in Figure 5 by multiplying the sensitivity map by the relative changes of NO<sub>2</sub>. The sensitivity is independent of how the driver changes as it tries to approximate the first-order derivative. As mentioned, the ultimate results are driven by multiple variables changing in the CH<sub>4</sub>-CO-OH system. Even though in the model framework, higher-order changes across all variables are affecting the results, having a first-order approximation is enough to understand how ECCOH works. When we applied the above equation to values in Figure 5, we noticed that the differences in  $\Delta\text{OH}$ s are very close to what we get from the online model, indicating that it is a reasonable approximation for sanity check.

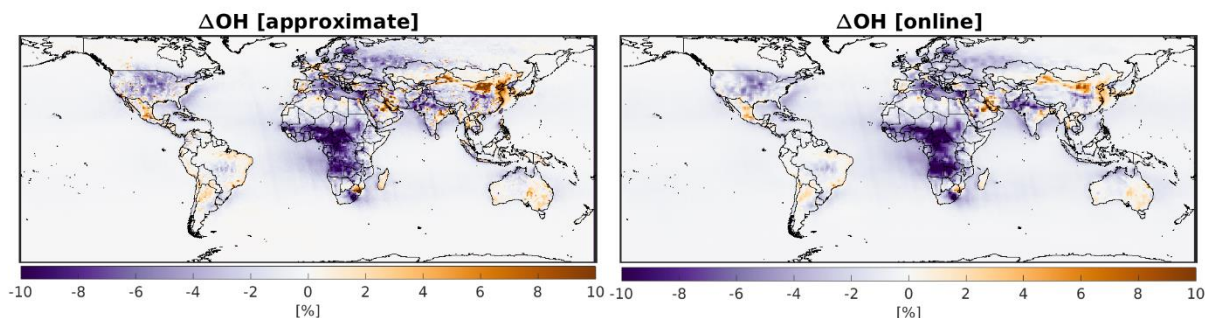

### Modifications

To clarify that we do not rely on these perturbations to generate the modeling results, we added:

“To elucidate the response of OH to different input parametrizations, such as NO<sub>2</sub>, HCHO, and O<sub>3</sub>, we determine the semi-normalized sensitivities through a traditional finite difference method:

$$SOH_i = \frac{[OH]_i^{110\%} - [OH]_i^{90\%}}{0.2} \quad (5)$$

where  $[OH]_i^{110\%}$  and  $[OH]_i^{90\%}$  are OH concentrations from perturbing input parameters ( $i$ ) by 1.1 and 0.9 scaling factors in the ECCOH offline framework (Anderson et al., 2022). **These calculations are solely used to better understand why OH changes in a particular way relative to the changes in its drivers. In our online modeling framework, OH is simultaneously affected by the dynamic changes of various variables considered in the parametrization of OH.**"

3) I feel that the trends in OH present in this study are substantially impacted by the trends of NO<sub>2</sub> and HCHO, which were constrained by OMI. What about the impacts of uncertainties in the trends of OMI observations on the OH estimates? Especially for HCHO, I have seen some papers showing that there were systematic errors in the global and latitudinal trends.

#### Response

The main purpose of using Bayesian data fusion is to make sure that only reliable satellite observations are used to make adjustments to the OH input parameterization. Additionally, the algorithm takes into account the differences between the MERRA2GMI fields and the data from the satellites. The initial concept is defined by the Kalman gain:

$$BH^T(\gamma HBH^T + E)^{-1}$$

And the second part by:

$$(Y - HX_b)$$

Their definitions can be found in Section 2.2.1. The multiplication of these two terms determines the adjustments applied to the ECCOH inputs. If the satellite observations are uncertain (low Kalman gain) and/or the difference between the satellite observations and the a priori (here M2GMI) is small, the results won't depend on the satellite information. In our draft, we observe both scenarios: OMI NO<sub>2</sub> provides reasonable information over cities, however the M2GMI NO<sub>2</sub> trends are not substantially different from the OMI (except for China). So, the linear trend results are largely influenced by the M2GMI information. We exclusively investigated this pattern in section 3.3.3, *OMI contributions to TOH trends*. For instance, we cannot gain a high amount of information from OMI HCHO over oceans, so regardless of the difference between M2GMI and OMI, the Bayesian algorithm does not suggest large adjustments.

However, we did not analyze the accuracy of the linear trends of OMI NO<sub>2</sub> and HCHO on a global scale. This is because we do not have a large number of long-term records of sky-radiance spectrometers that cover the period from 2005 to 2019. This limitation will not be an issue for future research, as many surface networks are expanding (e.g., FTIR, MAX-DOAS, Pandora). Nevertheless, we qualitatively compared the sign of our trends with several reputable studies.

To our best knowledge, our paper is one of the first attempts to leverage the newest version of OMI HCHO (v4) that has shown tremendous improvements with respect to in-situ measurements (Ayazpour et al., (2023):

<https://agu.confex.com/agu/fm23/meetingapp.cgi/Paper/1407690>). In particular, the radiance information has become more stable over time in V4, and the latitudinal biases have been removed based on Nowlan et al. (2023). The first author has closely worked with that team prior to joining GSFC and is fully aware of the new improvements.

4) Lines 498-500, the authors said “The correction factors, however, worsen the trends over the southeast US and Canada. This is essentially due to the use of the fractional errors in the a priori making the OMI corrections more impactful (i.e., higher Kalman gain) in summertime than in wintertime.” I did not understand what these sentences meant. Why did more impactful OMI corrections worsen the trends over the southeast US and Canada?

#### Response

**Due to the incorporation of data point errors in our trend analysis calculation, the data fusion algorithm works to reduce the errors of data points during periods of strong OMI HCHO signals (warmer seasons). This means that instead of assuming a constant 50% error, we now have varying errors with lower values during summertime and higher values (close to 50%) during wintertime (due to low SNR from OMI). As a result, we believe that this has caused some disagreements between OMI and the posterior estimates, particularly in statistically insignificant areas such as the southeast US, which experience large interannual and interdecadal variabilities. These variable errors can lead to different outcomes from the linear trend equation. When we don't take errors into account, the posterior results are similar to the prior ones, but we believe it's crucial to consider the errors.**

#### Modifications

**To better clarify and tone down this tendency we rewrote:**

“The posterior estimates better line up with the OMI trends, especially over the Amazon, India, and Central Africa (Text S3). The correction factors, however, worsen the trends over the southeast US and Canada. **One possible explanation for this may be the varying errors from the data fusion algorithm, which tend to be reduced more in summertime than in wintertime due to the larger OMI HCHO signal. This results in some degree of inconsistencies of the linear trend over these regions with larger interannual and interdecadal variabilities.**”.
